# Supplementary material
Source: publisher site journal article supplement (https://www.dovepress.com/article/396863)
Supplement: Supplementary file 1 [file get_supplementary_file.php]

**Supplementary Figures**

**
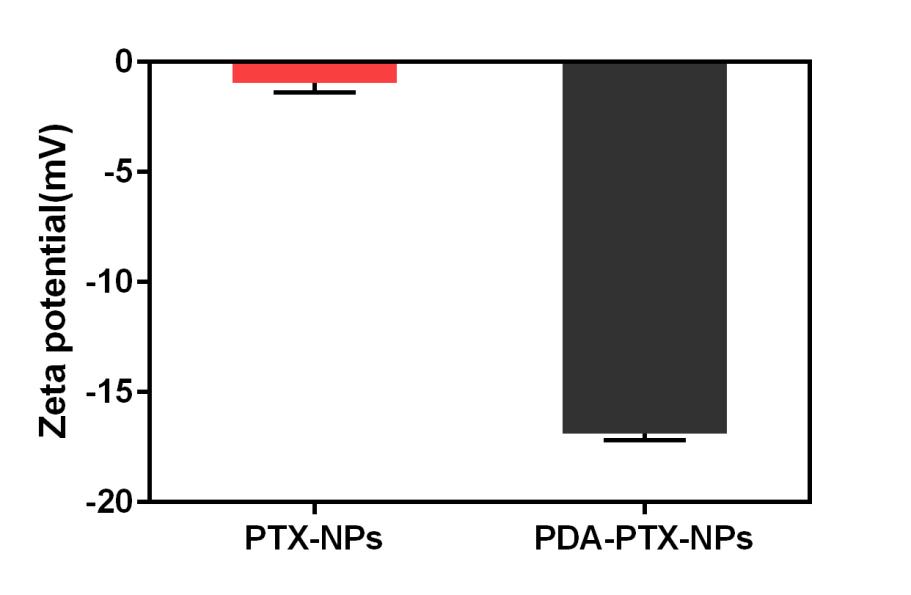
**

**Figure S1.** The average zeta potential of PTX-NPs and PDA-PTX-NPs. Data are presented as mean ± SD (n=3).

**
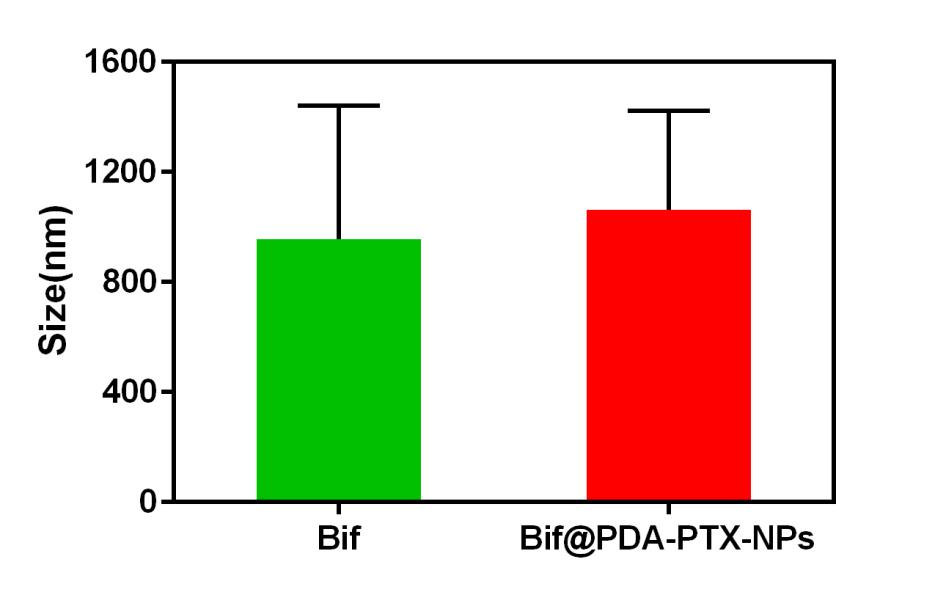
**

**Figure S2.** The average particle size of Bif and Bif@PDA-PTX-NPs. Data are presented as mean ± SD (n=3).

**
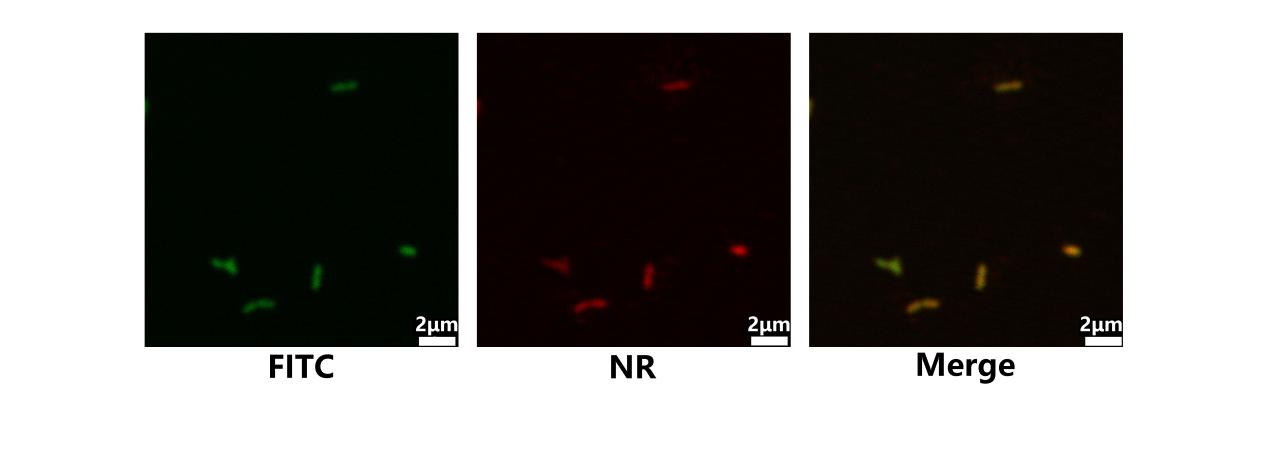
**

### Figure S3. The confocal microscope images of Bif@PDA-NR-NPs. Green fluorescence indicates the FITC-labelled Bif, red fluorescence shows the NR-labelled PDA-NR-NPs. (Scale bar=2μm).

**
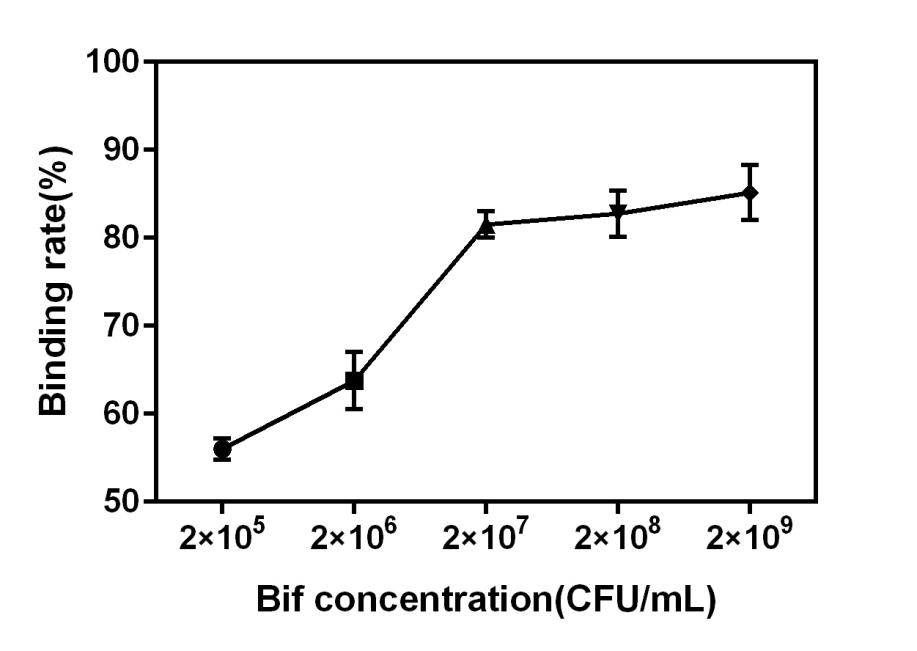
**

**Figure S4.** Binding rates of PTX-NPs on Bif with different concentrations. Data are represented as mean ± SD (n=3).

**
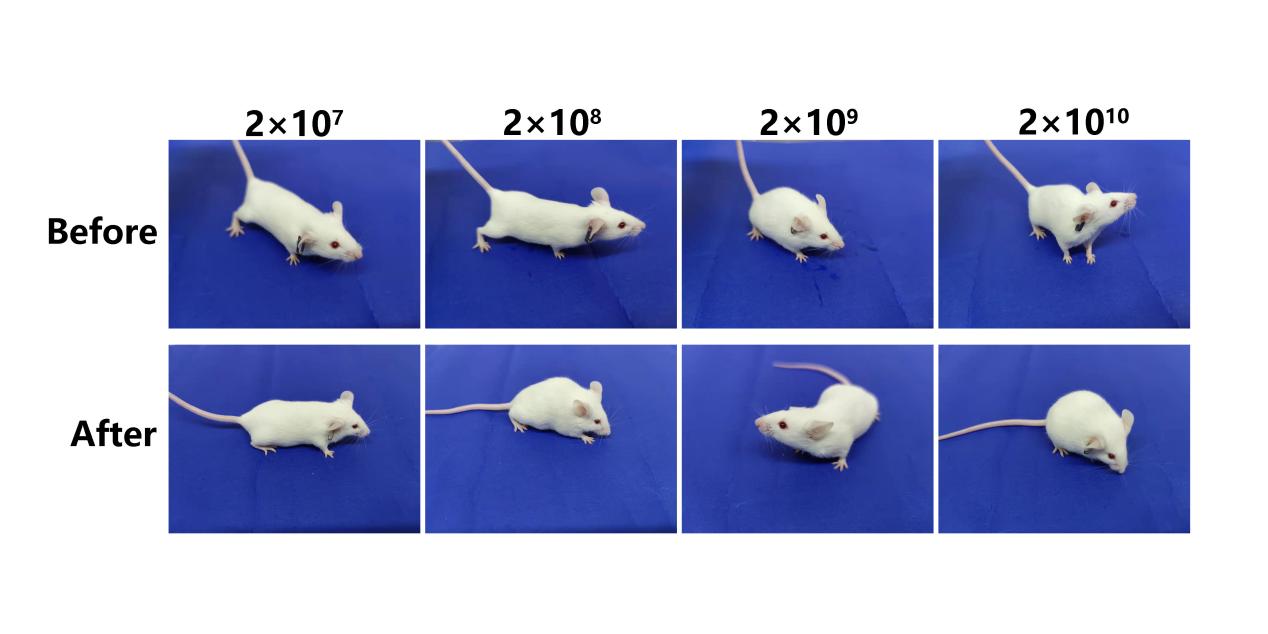
**

**Figure S5.** The photos of mice activity before and after tail injection of Bif suspensions with different concentrations.

**
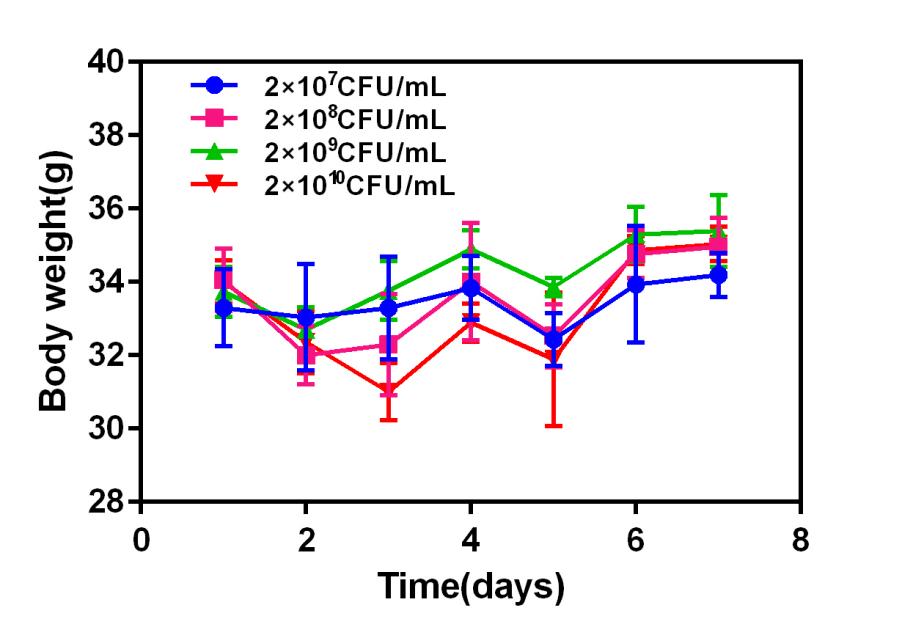
**

**Figure S6.** The body weight curves of mice after tail injection of Bif suspensions with different concentrations.

**
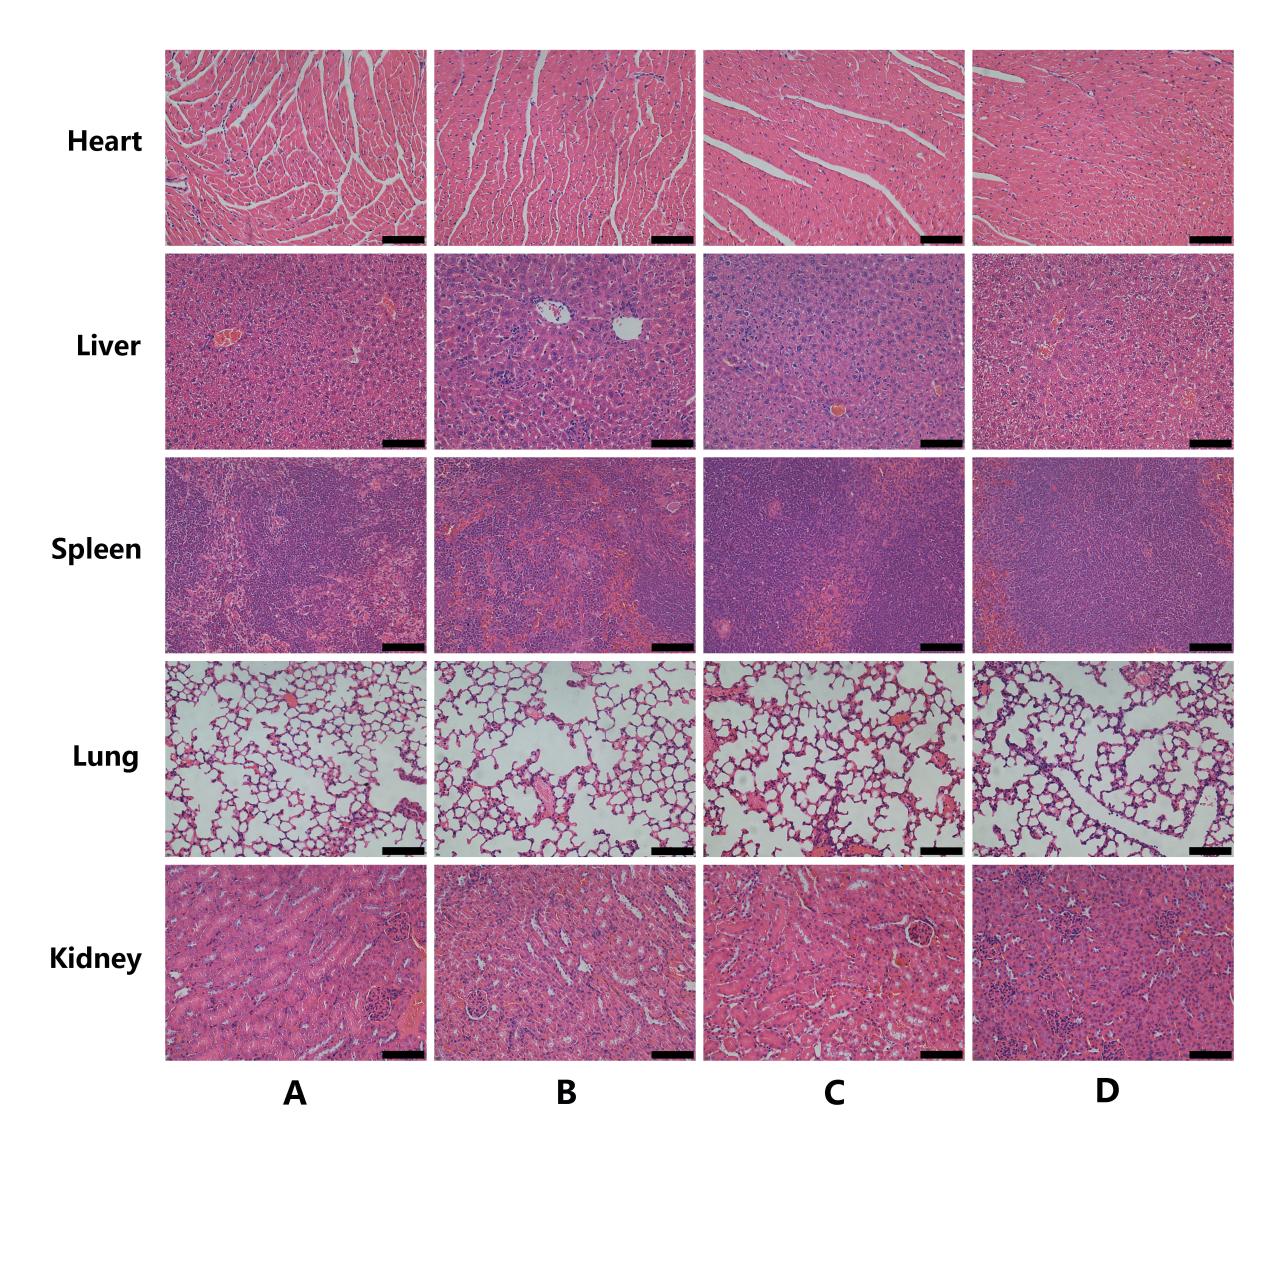
**

**Figure S7.** The hematoxylin and eosin staining images of major organs (including heart, liver, spleen, lung and kidney) after tail injection of Bif suspensions with different concentrations. (Scale bar=100μm). A: 2×107CFU/mL; B: 2×108CFU/mL; C: 2×109CFU/mL; D: 2×1010CFU/mL.

**
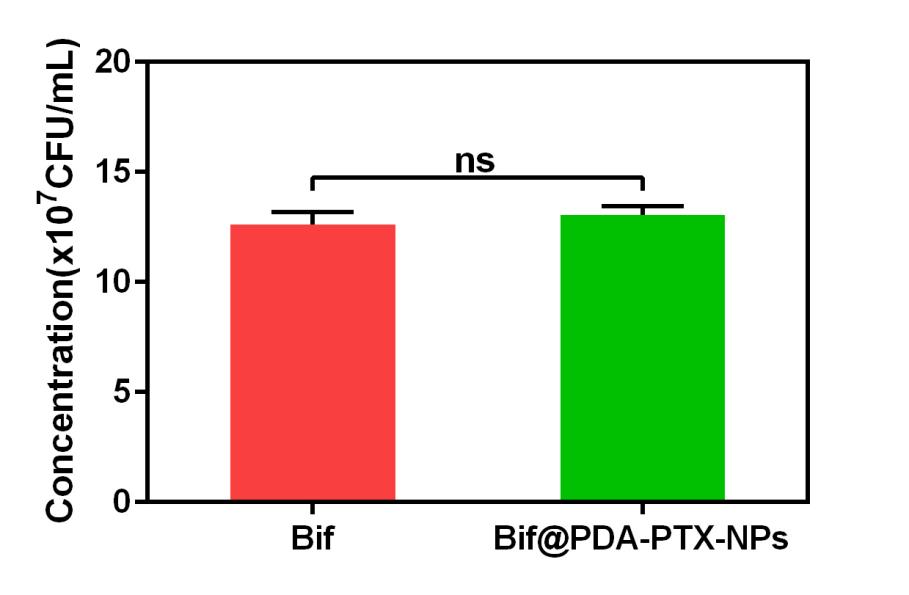
**

**Figure S8.** Thenumber of bacteria after anaerobic incubation for 24h. Data are presented as mean ± SD (n=3, ns: no statistical significance).

**
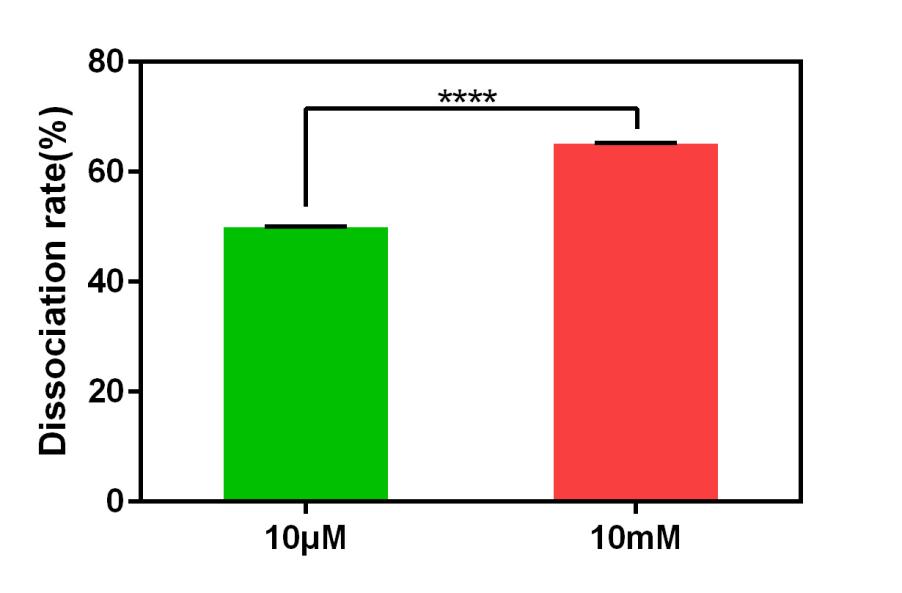
**

**Figure S9.** Dissociation rate of NR-NPs from Bif@PDA-NR-NPs solutions containing 10 μM GSH or 10 mM GSH. Data are presented as mean ± SD (n=3, ****P<0.0001).

**
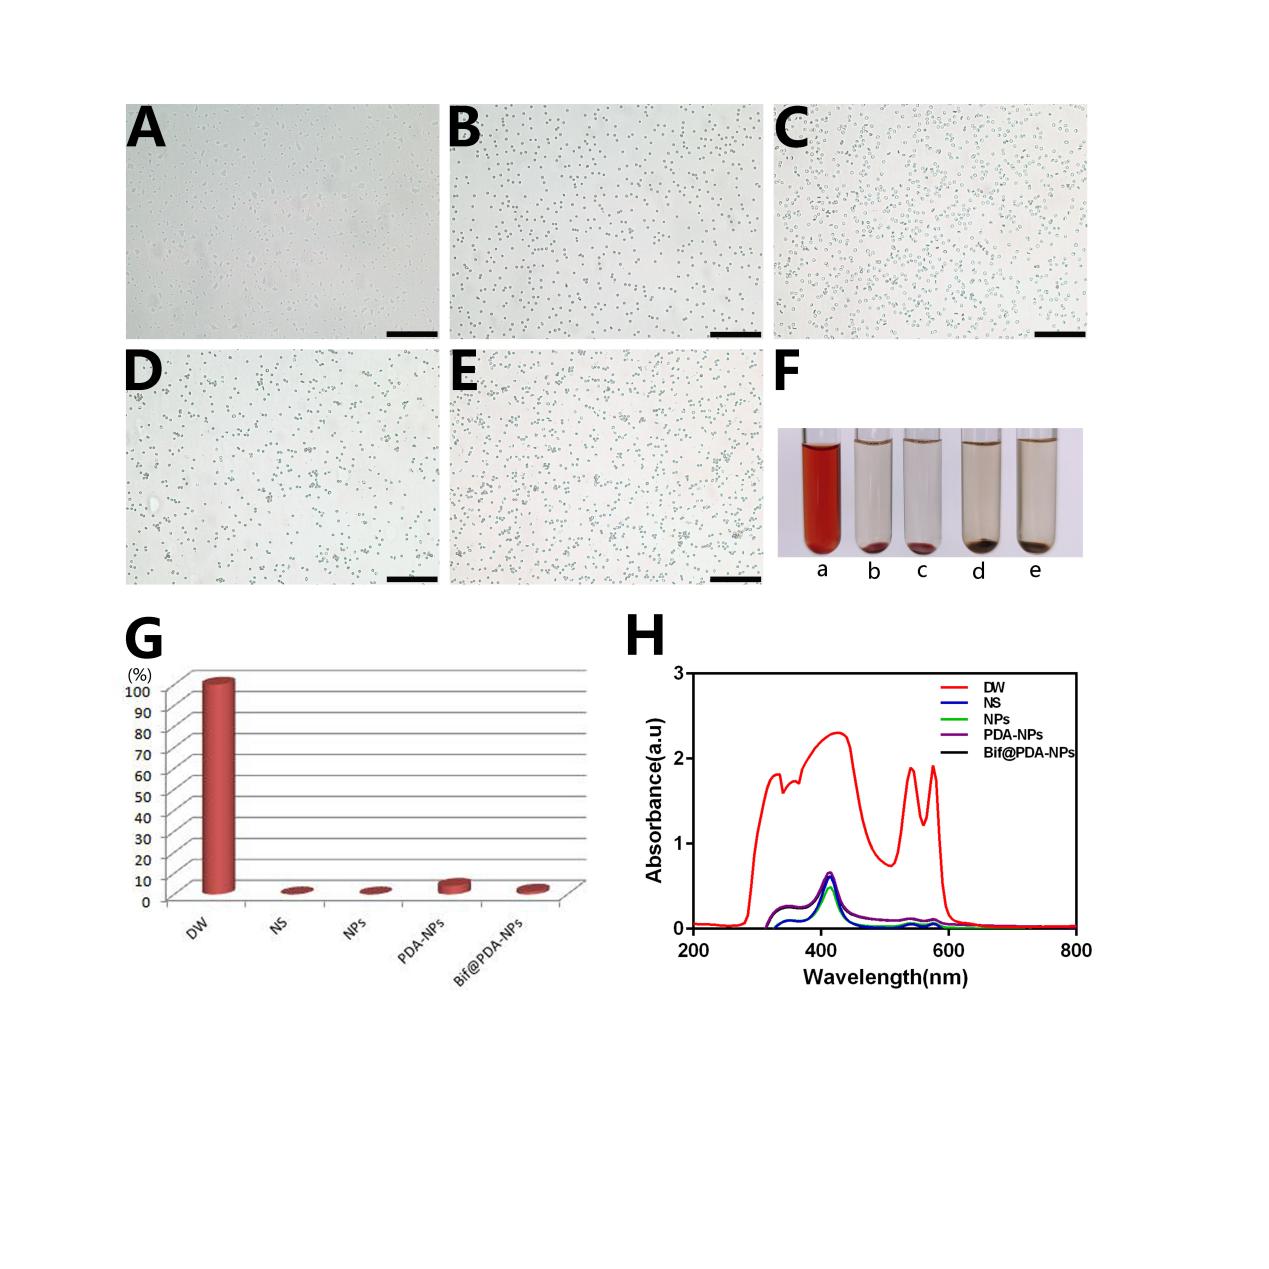
**

**Figure S10.** In vitro hemolysis analysis. (A-E) Representative microscope photos of red blood cells after incubated with different samples (Scale bar=100μm). A: distilled water (DW); B: normal saline (NS); C: NPs; D: PDA-NPs; E: Bif@PDA-NPs. (F) Photo of solutions in each group after centrifugation. a: DW; b: NS; c: NPs; d: PDA-NPs; e: Bif@PDA-NPs. (G) The hemolysis rate in each group. (H)UV-vis absorption spectra of hemolysis in each group.

**
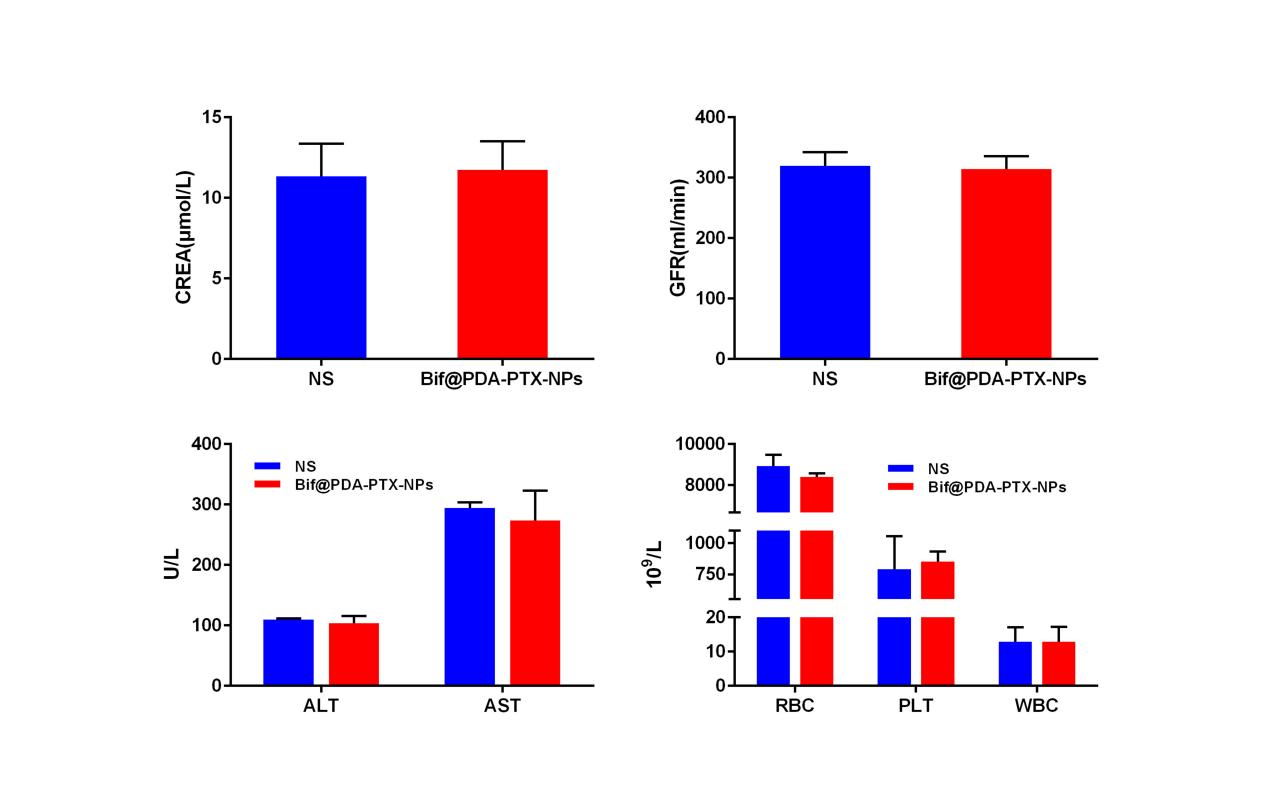
**

**Figure S11.** In vivo analysis of biochemistry and blood cell count of mice in the groups of NS and Bif@PDA-PTX-NPs. Data are presented as mean ± SD (n= 3). Abbreviations: creatinine (CREA), glomerular filtration rate (GFR), alanine aminotransferase (ALT), aspartate aminotransferase (AST), red blood cells (RBC), platelets (PLT), and white blood cells (WBC).
